CORRECTION

# Correction: Advancing the integration of spatial data to map human and natural drivers on coral reefs

The *PLOS ONE* Staff

## Notice of republication

Incorrect versions of Supporting Information files S1 Supplement and S2 Supplement were published in error. The publisher apologizes for the error. This article was republished on September 14, 2018 to correct for the error. Please download this article again to view the correct version.

## Reference

1. Wedding LM, Lecky J, Gove JM, Walecka HR, Donovan MK, Williams GJ, et al. (2018) Advancing the integration of spatial data to map human and natural drivers on coral reefs. *PLoS ONE* 13(3): e0189792. <https://doi.org/10.1371/journal.pone.0189792> PMID: 29494613

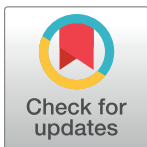

## OPEN ACCESS

**Citation:** The *PLOS ONE* Staff (2018) Correction: Advancing the integration of spatial data to map human and natural drivers on coral reefs. *PLoS ONE* 13(9): e0204760. <https://doi.org/10.1371/journal.pone.0204760>

**Published:** September 24, 2018

**Copyright:** © 2018 The PLOS ONE Staff. This is an open access article distributed under the terms of the [Creative Commons Attribution License](https://creativecommons.org/licenses/by/4.0/), which permits unrestricted use, distribution, and reproduction in any medium, provided the original author and source are credited.
